# Supplementary material for: Measuring and Monte Carlo Modelling of X-Ray and Gamma-Ray Attenuation in Personal Radiation Shielding Protective Clothing
Source: Comput Math Methods Med. 2019 Nov 19;2019:1641895. doi: 10.1155/2019/1641895 (PMC6885783; doi:10.1155/2019/1641895)
Supplement: Supplementary Materials — The electronic annex presents (1) numerical decrease of the various organs' contribution to the effective dose when protected with individual tested PPE exposed to the other simulated radionuclides dispersed in 10 m3 of the atmosphere in the RAC geometry (Table 2) and (2) visualisations of simulated ORNL phantom energy depositions while only wearing PPE preventing radioactive contamination, and the same PPE together with individual PPE protecting against X- and gamma-ray under it, in a various-dispersed radionuclide's aerosol atmosphere. [file 1641895.f1.zip › 1641895.f1/Electronic annex/Table 2 for all radionuclides.xlsx]

## Sheet: Table2
	Table 2: Decrease of various organs’ contribution to the effective dose in an atmosphere of given dispersed radionuclide. Organs included in “torso organs” are listed in the paper.
	Radionuclide:	Cs-137
	PPE against X- and gamma- rays	Torso organs	Lungs	Testes and genitalia	Brain	Thyroid	Skin
	DEMRON Full Body Suit	-0.0285208	-0.0252188	-0.0298922	-0.000236839	0.0220955	-0.80878
	DEMRON Class 2 Full Body Suit	-0.0275918	-0.0249792	-0.0277166	-0.000268703	0.0241961	-0.808455
	HKX1558 Whole Body Suit	-0.0709052	-0.0601898	-0.0871865	-0.0322078	-0.043868	-0.847152
	OPCH90 - the reference one	-0.0285005	-0.0246922	-0.0079921	0.0140765	0.0341953	-0.763056
	DEMRON Torso Vest 2Ply	-0.0354231	-0.029046	-0.0637444	-0.00573602	-0.0293046	-0.379484
	DEMRON Torso Vest 4Ply	-0.0591789	-0.0521252	-0.0902393	-0.00945028	-0.0473182	-0.382699
	DF-VEST W-2mm	-0.203703	-0.179242	-0.274975	-0.0297226	-0.127122	-0.486448
	BIORUBBER RSM E400 Torso Vest	-0.0700682	-0.0772235	-0.0201215	-0.0125553	-0.0528103	-0.347127
	BIORUBBER RSM E600 Torso Vest	-0.149488	-0.156263	-0.0331959	-0.0218655	-0.0927036	-0.344247
	Radionuclide:	I-131
	PPE against X- and gamma- rays	Torso organs	Lungs	Testes and genitalia	Brain	Thyroid	Skin
	DEMRON Full Body Suit	-0.0542157	-0.0486529	-0.0479641	-0.0152707	-0.0104137	-0.848159
	DEMRON Class 2 Full Body Suit	-0.0523274	-0.0471552	-0.0448521	-0.0151881	-0.00854227	-0.848014
	HKX1558 Whole Body Suit	-0.142709	-0.135134	-0.150948	-0.0804569	-0.113123	-0.879979
	OPCH90 - the reference one	-0.0474058	-0.0432357	-0.0050872	0.0158891	0.0392733	-0.820841
	DEMRON Torso Vest 2Ply	-0.0720947	-0.0630939	-0.0847276	-0.00977705	-0.043348	-0.391934
	DEMRON Torso Vest 4Ply	-0.122668	-0.109853	-0.132322	-0.0159658	-0.0717339	-0.396017
	DF-VEST W-2mm	-0.386565	-0.340318	-0.4629	-0.0387716	-0.196557	-0.508394
	BIORUBBER RSM E400 Torso Vest	-0.157771	-0.162185	-0.0520055	-0.0186025	-0.0933635	-0.360689
	BIORUBBER RSM E600 Torso Vest	-0.299769	-0.309365	-0.0716587	-0.032908	-0.143162	-0.359169
	Radionuclide:	La-140
	PPE against X- and gamma- rays	Torso organs	Lungs	Testes and genitalia	Brain	Thyroid	Skin
	DEMRON Full Body Suit	-0.048569	-0.0174607	-0.195042	0.00444721	-0.00151477	-0.712488
	DEMRON Class 2 Full Body Suit	-0.0467363	-0.0176922	-0.185694	0.00336869	-0.000513537	-0.709588
	HKX1558 Whole Body Suit	-0.0793404	-0.0434069	-0.262935	-0.0154387	-0.0372601	-0.859003
	OPCH90 - the reference one	-0.037947	-0.0189557	-0.122967	0.0162884	0.0175485	-0.468193
	DEMRON Torso Vest 2Ply	-0.05627	-0.0217146	-0.252121	-0.0035646	-0.0122548	-0.398909
	DEMRON Torso Vest 4Ply	-0.0732746	-0.0352557	-0.275143	-0.00536028	-0.0214907	-0.41012
	DF-VEST W-2mm	-0.172298	-0.125694	-0.380166	-0.0205572	-0.0584456	-0.502972
	BIORUBBER RSM E400 Torso Vest	-0.0467059	-0.0544756	-0.0127309	-0.00629127	-0.00571186	-0.375303
	BIORUBBER RSM E600 Torso Vest	-0.0984424	-0.107734	-0.0215454	-0.0163597	-0.0431075	-0.368164
	Radionuclide:	Na-24
	PPE against X- and gamma- rays	Torso organs	Lungs	Testes and genitalia	Brain	Thyroid	Skin
	DEMRON Full Body Suit	-0.029117	-0.010673	-0.123615	0.00748764	0.00992981	-0.698
	DEMRON Class 2 Full Body Suit	-0.0282004	-0.010294	-0.118617	0.00719253	0.0079985	-0.695475
	HKX1558 Whole Body Suit	-0.0496348	-0.0244187	-0.156141	-0.0063599	-0.00850199	-0.823252
	OPCH90 - the reference one	-0.0249117	-0.012035	-0.0786794	0.0153187	0.0387113	-0.457437
	DEMRON Torso Vest 2Ply	-0.0317997	-0.0100099	-0.162995	-0.00266246	-0.0228592	-0.386438
	DEMRON Torso Vest 4Ply	-0.0423838	-0.0189959	-0.17708	-0.00470669	-0.0222767	-0.392058
	DF-VEST W-2mm	-0.105788	-0.0799892	-0.24524	-0.0170323	-0.0372886	-0.479066
	BIORUBBER RSM E400 Torso Vest	-0.0293397	-0.0348013	-0.0109203	-0.00539655	0.000622854	-0.357348
	BIORUBBER RSM E600 Torso Vest	-0.063681	-0.0667544	-0.0170875	-0.0101829	-0.047254	-0.350517
	Radionuclide:	Tc-99m
	PPE against X- and gamma- rays	Torso organs	Lungs	Testes and genitalia	Brain	Thyroid	Skin
	DEMRON Full Body Suit	-0.266517	-0.247972	-0.285233	-0.156677	-0.24648	-0.432423
	DEMRON Class 2 Full Body Suit	-0.254873	-0.24158	-0.26351	-0.156336	-0.239838	-0.428786
	HKX1558 Whole Body Suit	-0.588758	-0.572906	-0.606949	-0.436561	-0.589406	-0.687901
	OPCH90 - the reference one	-0.126782	-0.1208	0.00090931	0.0142487	0.0474805	-0.390963
	DEMRON Torso Vest 2Ply	-0.372867	-0.343485	-0.362363	-0.0383025	-0.21586	-0.279027
	DEMRON Torso Vest 4Ply	-0.560292	-0.524264	-0.538969	-0.0491491	-0.290678	-0.350147
	DF-VEST W-2mm	-0.92818	-0.832433	-0.969809	-0.0575039	-0.358396	-0.547689
	BIORUBBER RSM E400 Torso Vest	-0.626047	-0.644635	-0.16105	-0.051278	-0.287494	-0.363365
	BIORUBBER RSM E600 Torso Vest	-0.75985	-0.806686	-0.139078	-0.0555945	-0.339646	-0.40084
